# Supplementary material for: Decreasing operating potential for water electrolysis to hydrogen via local confinement of iron-based soft coordination suprapolymers
Source: Royal Society of Chemistry journal article supplement (doi:10.1039/c3cp53152j), 2013-01-01
Supplement: c3cp53152j.pdf [file c3cp53152j.pdf]

Supporting information available for:

**Decreasing Operating Potential for Water Electrolysis to  
Hydrogen via Local Confinement of Irion-Based Soft  
Coordination Suprapolymers**

Yawei Liang, Limin Xu, Yinglin Zhou<sup>\*</sup>, Xinxiang Zhang, Jianbin Huang<sup>\*</sup>, Yun Yan<sup>\*</sup>,

Beijing National Laboratory for Molecular Sciences (BNLMS), State Key Laboratory  
for Structural Chemistry of Unstable and Stable Species, Key Laboratory of  
Biochemistry and Molecular Engineering, College of Chemistry and Molecular  
Engineering, Peking University, Beijing, 100871, PR China

---

<sup>\*</sup> Correspondence: yunyan@pku.edu.cn; zhouyl@pku.edu.cn; jbh Huang@pku.edu.cn

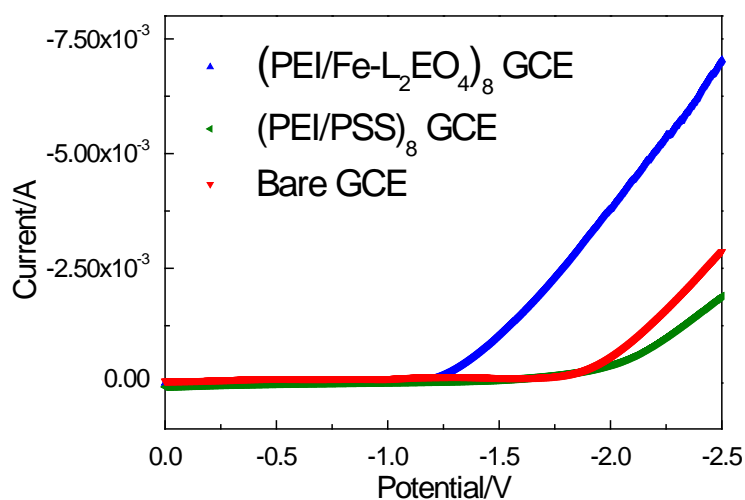

Figure S1. Experimental voltammetry of  $H^+$  reduction at the different GCE surface. Replacing the Fe-SCSP (the blue line) with another negatively charged electrolytes-polystyrene sodium sulphite (PSS), only decreases of the proton reduction current without a potential movement was observed(the green line). This control experiment demonstrated that the Fe-SCSP is very crucial in the catalytic hydrogen evolution.

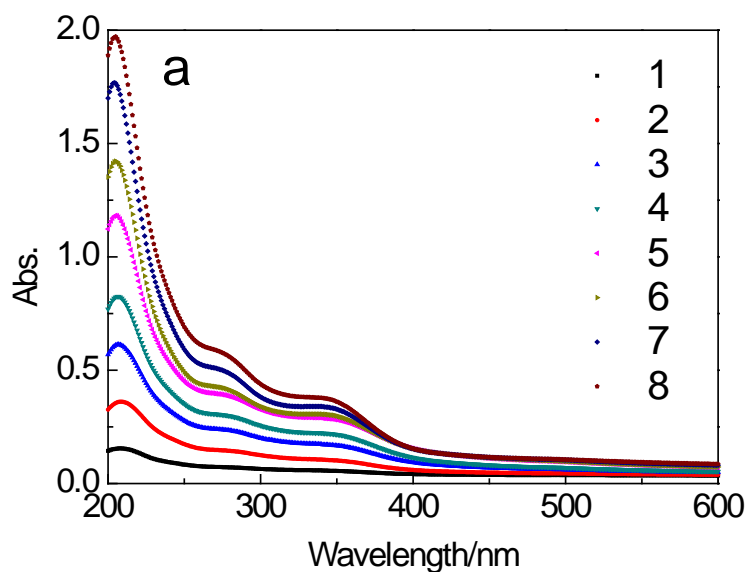

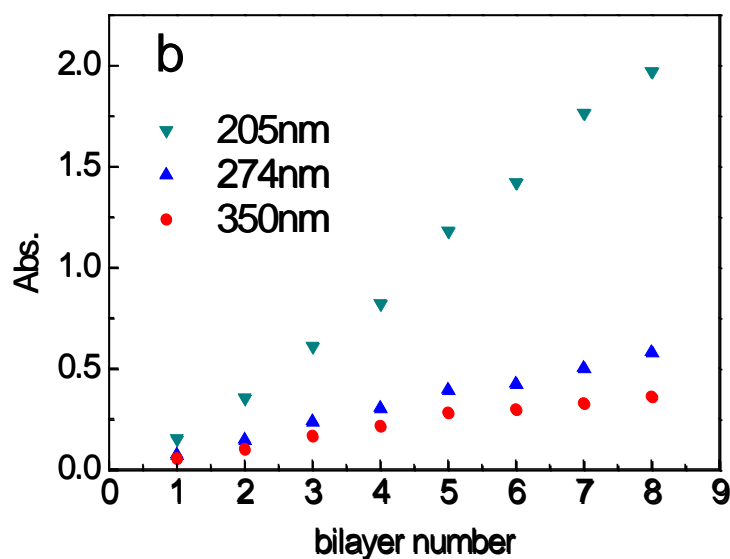

Figure S2. The linear growth of the mass of the layer by layer assembly film: (a) The UV-Vis spectroscopy of the  $(\text{PEI}/\text{Fe}^{3+}\text{-L}_2\text{EO}_4)_n$  layer by layer assembly film on the quartz glass substrate, bilayer number  $n = 1, 2, 3, 4, 5, 6, 7, 8$ ; (b) And the intensity of this UV-Vis spectroscopy grows linearly at certain wavelengths with an increasing of the bilayer number  $n$ . The absorptions at 274 nm and 350 nm wavelength characterize the coordination bonds in the  $\text{Fe}^{3+}\text{-L}_2\text{EO}_4$  structure.
